# Supplementary material
Source: publisher site journal article supplement (https://www.dovepress.com/article/245040)
Supplement: Supplementary file 1 [file get_supplementary_file.php]

**Supplemental Table 1:** Asthma medication responses and classification

| Brand Name | Chemical Name | Classification |
| --- | --- | --- |
| **advair** | fluticasone and salmeterol | combination corticosteroid/long-acting beta agonists |
| **advair diskus 50mcg daily** | fluticasone and salmeterol | combination corticosteroid/long-acting beta agonists |
| **advair proair** | fluticasone and salmeterol, albuterol | combination corticosteroid/long-acting beta agonists, short-acting beta agonists |
| **aerobid** | flunisolide | inhaled corticosteroids |
| **albuterol** | albuterol sulfate | short-acting beta agonists |
| **albuterol and singular** | albuterol sulfate, montelukast | short-acting beta agonists, leukotriene modifiers |
| **albuterol inhaler** | albuterol sulfate | short-acting beta agonists |
| **albuterol mdi** | albuterol sulfate | short-acting beta agonists |
| **albuterol sulfate** | albuterol sulfate | short-acting beta agonists |
| **albuterol** | albuterol sulfate | short-acting beta agonists |
| **alvesco** | ciclesonide | inhaled corticosteroids |
| **asmanex** | mometasone | inhaled corticosteroids |
| **breo** | flucticasone furoate and vilanterol | combination corticosteroid/long-acting beta agonists |
| **breo 200** | flucticasone furoate and vilanterol | combination corticosteroid/long-acting beta agonists |
| **celestene** | betamethasone | inhaled corticosteroids |
| **dulera** | mometasone and formoterol | combination corticosteroid/long-acting beta agonists |
| **fast acting inhaler** | N/A (likely albuterol) | short-acting beta agonists |
| **flovent** | fluticasone propionate | inhaled corticosteroids |
| **inhaler albuterol** | albuterol sulfate | short-acting beta agonists |
| **levalbuterol** | levalbuterol | short-acting beta agonists |
| **montelukast** | montelukast | leukotriene modifiers |
| **proair** | albuterol sulfate | short-acting beta agonists |
| **proair albuterol** | albuterol sulfate | short-acting beta agonists |
| **proair hfa** | albuterol sulfate HFA | short-acting beta agonists |
| **proair inhaler** | albuterol sulfate | short-acting beta agonists |
| **proventil** | albuterol sulfate | short-acting beta agonists |
| **pulmicort** | budesonide | inhaled corticosteroids |
| **qvar** | beclomethasone diproprionate | inhaled corticosteroids |
| **respiclick** | albuterol sulfate | short-acting beta agonists |
| **salbutamol** | albuterol sulfate | short-acting beta agonists |
| **singulair** | montelukast | leukotriene modifiers |
| **symbicort** | budesonide and formoterol | combination corticosteroid/long-acting beta agonists |
| **ventolin** | albuterol Sulfate | short-acting beta agonists |
| **ventolin hfa** | albuterol Sulfate HFA | short-acting beta agonists |
| **ventolin inhaler** | albuterol Sulfate | short-acting beta agonists |
| **xopenex** | levalbuterol HCl | short-acting beta agonists |
| **zenhale** | mometasone furoate and formoterol fumarate | combination corticosteroid/long-acting beta agonists |

**Supplemental Table 2:**

**Asthma diagnosis and medication use and fecundability among participants with less than or equal to three cycles of attempted pregnancy at baseline**

|  | Number of | Number of | Adjusted |
| --- | --- | --- | --- |
| Exposure | Pregnancies | Cycles | FR (95% CI) |
|  |  |  |  |
| No asthma diagnosis, no medication use | 3390 | 20811 | Ref |
| Ever diagnosed with asthma, no medication use | 433 | 2719 | 1.00 (0.91-1.10) |
|  |  |  |  |
| **Asthma medication usec** |  |  |  |
| Any | 220 | 1349 | 1.01 (0.89-1.15) |
|  |  |  |  |

**Asthma diagnosis and medication use and fecundability among participants with more than three cycles of attempted pregnancy at baseline**

|  | Number of | Number of | Adjusted |
| --- | --- | --- | --- |
| Exposure | Pregnancies | Cycles | FR (95% CI) |
|  |  |  |  |
| No asthma diagnosis, no medication use | 625 | 5049 | Ref |
| Ever diagnosed with asthma, no medication use | 82 | 755 | 0.92 (0.74-1.14) |
|  |  |  |  |
| **Asthma medication usec** |  |  |  |
| Any | 49 | 430 | 0.97 (0.72-1.30) |
|  |  |  |  |

**Note**s: adjusted for age, BMI, race, education, income, smoking status, hormonal birth control as last form of birth control, intercourse frequency, doing something to improve chances of getting pregnant, physical activity, region of residence, anxiety diagnosis, depression diagnosis, hay fever diagnosis, health insurance, primary care provider visits, MDI score, PSS score
